# Supplementary material
Source: MDPI journal article supplement (https://www.mdpi.com/1999-4907/12/9/1227)
Supplement: s1 [file s1]

## Supplementary Material

**Table S1.** Initial nutrient stocks of each considered *E. grandis* and *P. taeda* litter layer

| Variable                  | <i>E. grandis</i> |                     |                   | <i>P. taeda</i>   |                   |                     |
|---------------------------|-------------------|---------------------|-------------------|-------------------|-------------------|---------------------|
|                           | C1                | C2                  | C3                | C1                | C2                | C3                  |
| N (kg ha <sup>-1</sup> )  | 20.23<br>(0.95)   | 28.71<br>(1.69)     | 18.56<br>(1.53)   | 17.65<br>(0.37)   | 21.90<br>(1.73)   | 35.99<br>(2.16)     |
| P (kg ha <sup>-1</sup> )  | 0.60<br>(0.04)    | 1.15<br>(0.08)      | 0.86<br>(0.08)    | 0.91<br>(0.16)    | 1.29<br>(0.05)    | 2.51<br>(0.35)      |
| K (kg ha <sup>-1</sup> )  | 3.86<br>(0.26)    | 10.08<br>(0.76)     | 5.68<br>(0.65)    | 2.18<br>(0.23)    | 4.00<br>(0.13)    | 7.77<br>(0.87)      |
| Ca (kg ha <sup>-1</sup> ) | 16.23<br>(0.41)   | 30.45<br>(1.00)     | 22.74<br>(0.53)   | 8.63<br>(0.33)    | 10.25<br>(0.53)   | 16.88<br>(0.54)     |
| Mg (kg ha <sup>-1</sup> ) | 2.72<br>(0.25)    | 6.39<br>(0.18)      | 5.08<br>(0.22)    | 1.62<br>(0.05)    | 2.25<br>(0.06)    | 4.63<br>(0.17)      |
| Fe (g ha <sup>-1</sup> )  | 270.06<br>(35.52) | 268.07<br>(9.90)    | 163.73<br>(8.17)  | 175.38<br>(29.70) | 132.68<br>(1.73)  | 221.60<br>(20.42)   |
| Mn (g ha <sup>-1</sup> )  | 586.04<br>(32.17) | 1747.42<br>(147.59) | 995.21<br>(48.87) | 590.78<br>(14.71) | 793.75<br>(51.32) | 1513.82<br>(190.56) |
| Cu (g ha <sup>-1</sup> )  | 7.64<br>(0.39)    | 22.60<br>(0.59)     | 16.16<br>(1.36)   | 4.40<br>(0.18)    | 10.27<br>(1.56)   | 16.98<br>(3.30)     |
| Zn (g ha <sup>-1</sup> )  | 24.22<br>(2.33)   | 41.43<br>(1.08)     | 30.66<br>(5.90)   | 42.12<br>(3.48)   | 49.60<br>(5.13)   | 91.56<br>(8.14)     |

<sup>1</sup>Data from Baietto et al., 2021. C1: winter layer, year 1; C2: spring layer, year 1; C3: summer layer, year 1. The value in parentheses indicates the standard error of the mean ( $n = 3$ ).

**Table S2.** Generalized linear mixed models adjusted for data of both forest species for the remaining nutrient concentration (C1 layer).

| Nutrient |                | Coefficient <sup>1</sup> | t-value             | R <sub>p</sub> <sup>2</sup> |
|----------|----------------|--------------------------|---------------------|-----------------------------|
| N        | Intercept      | 0.054 (0.045)            | 1.18 <sup>ns</sup>  | 0.33                        |
|          | Time           | 0.010 (0.003)            | 3.42 <sup>**</sup>  |                             |
|          | Species        | 0.080 (0.064)            | 1.25 <sup>ns</sup>  |                             |
|          | Species × Time | −0.004 (0.004)           | −0.91 <sup>ns</sup> |                             |
| K        | Intercept      | −0.082 (0.131)           | −0.62 <sup>ns</sup> | 0.60                        |
|          | Time           | −0.065 (0.009)           | −7.15 <sup>**</sup> |                             |
|          | Species        | 0.173 (0.185)            | 0.93 <sup>ns</sup>  |                             |
|          | Species × Time | −0.010 (0.013)           | −0.75 <sup>ns</sup> |                             |
| Fe       | Intercept      | 0.446 (0.100)            | 4.43 <sup>**</sup>  | 0.46                        |
|          | Time           | 0.039 (0.007)            | 5.57 <sup>**</sup>  |                             |
|          | Species        | −0.122 (0.142)           | −0.86 <sup>ns</sup> |                             |
|          | Species × Time | 0.012 (0.010)            | 1.24 <sup>ns</sup>  |                             |

<sup>ns</sup>: no significant; <sup>\*\*</sup>:  $p < 0.05$ ; R<sub>p</sub><sup>2</sup>: conditional pseudo-R squared. <sup>1</sup> The values in parentheses indicate the standard error.

**Table S3.** Generalized linear mixed models adjusted for data of both forest species for the remaining nutrient concentration (C2 layer).

| Nutrient |                | Coefficient <sup>1</sup> | t-value             | R <sub>p</sub> <sup>2</sup> |
|----------|----------------|--------------------------|---------------------|-----------------------------|
| N        | Intercept      | 0.013 (0.032)            | 0.41 <sup>ns</sup>  | 0.69                        |
|          | Time           | 0.024 (0.003)            | 8.54 <sup>**</sup>  |                             |
|          | Species        | 0.076 (0.045)            | 1.69 <sup>ns</sup>  |                             |
|          | Species × Time | −0.013 (0.004)           | −3.30 <sup>**</sup> |                             |
| K        | Intercept      | −0.309 (0.125)           | −2.48 <sup>**</sup> | 0.59                        |
|          | Time           | −0.074 (0.011)           | −6.78 <sup>**</sup> |                             |
|          | Species        | 0.138 (0.176)            | 0.78 <sup>ns</sup>  |                             |
|          | Species × Time | −0.030 (0.015)           | −1.97 <sup>**</sup> |                             |
| Fe       | Intercept      | 0.054 (0.068)            | 0.79 <sup>ns</sup>  | 0.81                        |
|          | Time           | 0.072 (0.006)            | 12.57 <sup>**</sup> |                             |
|          | Species        | 0.088 (0.096)            | 0.92 <sup>ns</sup>  |                             |
|          | Species × Time | −0.023 (0.008)           | −2.83 <sup>**</sup> |                             |
| Cu       | Intercept      | −0.057 (0.044)           | −1.28 <sup>ns</sup> | 0.30                        |
|          | Time           | −0.001 (0.004)           | −0.24 <sup>ns</sup> |                             |
|          | Species        | 0.127 (0.063)            | 2.02 <sup>**</sup>  |                             |
|          | Species × Time | −0.021 (0.006)           | −3.68 <sup>**</sup> |                             |
| Zn       | Intercept      | 0.147 (0.080)            | 1.84 <sup>ns</sup>  | 0.64                        |
|          | Time           | 0.043 (0.006)            | 6.86 <sup>**</sup>  |                             |
|          | Species        | −0.038 (0.113)           | −0.33 <sup>ns</sup> |                             |
|          | Species × Time | −0.018 (0.009)           | −1.99 <sup>**</sup> |                             |

<sup>ns</sup>: no significant; <sup>\*\*</sup>:  $p < 0.05$ ; R<sub>p</sub><sup>2</sup>: conditional pseudo-R squared. <sup>1</sup> The values in parentheses indicate the standard error.

**Table S4.** Generalized linear mixed models adjusted for data of both forest species for the remaining nutrient concentration (C3 layer).

| Nutrient |                | Coefficient <sup>1</sup> | t-value             | R <sub>p</sub> <sup>2</sup> |
|----------|----------------|--------------------------|---------------------|-----------------------------|
| N        | Intercept      | 0.061 (0.049)            | 1.24 <sup>ns</sup>  | 0.72                        |
|          | Time           | 0.044 (0.005)            | 8.90 <sup>**</sup>  |                             |
|          | Species        | 0.026 (0.069)            | 0.38 <sup>ns</sup>  |                             |
|          | Species × Time | −0.013 (0.007)           | −1.88 <sup>ns</sup> |                             |
| P        | Intercept      | −0.025 (0.053)           | −0.48 <sup>ns</sup> | 0.56                        |
|          | Time           | 0.005 (0.005)            | 0.92 <sup>ns</sup>  |                             |
|          | Species        | 0.046 (0.074)            | 0.62 <sup>ns</sup>  |                             |
|          | Species × Time | −0.028 (0.007)           | −3.98 <sup>**</sup> |                             |
| K        | Intercept      | −0.372 (0.128)           | −2.91 <sup>**</sup> | 0.47                        |
|          | Time           | −0.064 (0.014)           | −4.57 <sup>**</sup> |                             |
|          | Species        | 0.040 (0.181)            | 0.22 <sup>ns</sup>  |                             |
|          | Species × Time | −0.034 (0.020)           | −1.72 <sup>ns</sup> |                             |
| Ca       | Intercept      | −0.009 (0.050)           | −0.18 <sup>ns</sup> | 0.52                        |
|          | Time           | 0.026 (0.005)            | 5.44 <sup>**</sup>  |                             |
|          | Species        | 0.024 (0.071)            | 0.34 <sup>ns</sup>  |                             |
|          | Species × Time | −0.006 (0.007)           | −0.85 <sup>ns</sup> |                             |
| Fe       | Intercept      | 0.132 (0.103)            | 1.28 <sup>ns</sup>  | 0.78                        |
|          | Time           | 0.094 (0.009)            | 10.18 <sup>**</sup> |                             |
|          | Species        | −0.125 (0.145)           | −0.86 <sup>ns</sup> |                             |
|          | Species × Time | −0.010 (0.013)           | −0.75 <sup>ns</sup> |                             |
| Mn       | Intercept      | −0.032 (0.064)           | −0.50 <sup>ns</sup> | 0.42                        |
|          | Time           | 0.020 (0.006)            | 3.14 <sup>**</sup>  |                             |
|          | Species        | 0.131 (0.091)            | 1.44 <sup>ns</sup>  |                             |
|          | Species × Time | 0.002 (0.009)            | 0.23 <sup>ns</sup>  |                             |
| Zn       | Intercept      | 0.186 (0.082)            | 2.26 <sup>**</sup>  | 0.78                        |
|          | Time           | 0.055 (0.007)            | 8.18 <sup>**</sup>  |                             |
|          | Species        | −0.126 (0.116)           | −1.08 <sup>ns</sup> |                             |
|          | Species × Time | −0.020 (0.010)           | −2.13 <sup>**</sup> |                             |

<sup>ns</sup>: no significant; <sup>\*\*</sup>:  $p < 0.05$ ; R<sub>p</sub><sup>2</sup>: conditional pseudo-R squared. <sup>1</sup> The values in parentheses indicate the standard error.

**Table S5.** Generalized linear mixed models adjusted for data of both forest species for the remaining nutrient content (C1 layer).

| Nutrient |                | Coefficient <sup>1</sup> | t-value             | R <sub>p</sub> <sup>2</sup> |
|----------|----------------|--------------------------|---------------------|-----------------------------|
| N        | Intercept      | 0.039 (0.059)            | 0.66 <sup>ns</sup>  | 0.44                        |
|          | Time           | −0.026 (0.005)           | −5.78 **            |                             |
|          | Species        | −0.068 (0.083)           | −0.82 <sup>ns</sup> |                             |
|          | Species × Time | 0.005 (0.006)            | 0.69 <sup>ns</sup>  |                             |
| P        | Intercept      | 0.087 (0.085)            | 1.03 <sup>ns</sup>  | 0.57                        |
|          | Time           | −0.037 (0.006)           | −6.40 **            |                             |
|          | Species        | −0.250 (0.120)           | −2.08 **            |                             |
|          | Species × Time | 0.006 (0.008)            | 0.73 <sup>ns</sup>  |                             |
| K        | Intercept      | −0.115 (0.154)           | −0.75 <sup>ns</sup> | 0.65                        |
|          | Time           | −0.097 (0.011)           | −8.54 **            |                             |
|          | Species        | 0.035 (0.217)            | 0.16 <sup>ns</sup>  |                             |
|          | Species × Time | −0.002 (0.016)           | −0.12 <sup>ns</sup> |                             |
| Ca       | Intercept      | 0.048 (0.081)            | 0.60 <sup>ns</sup>  | 0.54                        |
|          | Time           | −0.042 (0.006)           | −6.83 **            |                             |
|          | Species        | 0.003 (0.114)            | 0.03 <sup>ns</sup>  |                             |
|          | Species × Time | −0.011 (0.009)           | −1.22 <sup>ns</sup> |                             |
| Mg       | Intercept      | −0.082 (0.072)           | −1.14 <sup>ns</sup> | 0.56                        |
|          | Time           | −0.038 (0.006)           | −6.90 **            |                             |
|          | Species        | −0.046 (0.102)           | −0.45 <sup>ns</sup> |                             |
|          | Species × Time | −0.009 (0.008)           | −1.17 <sup>ns</sup> |                             |
| Mn       | Intercept      | 0.118 (0.064)            | 1.84 <sup>ns</sup>  | 0.47                        |
|          | Time           | −0.022 (0.004)           | −4.96 **            |                             |
|          | Species        | −0.146 (0.090)           | −1.61 <sup>ns</sup> |                             |
|          | Species × Time | 0.018 (0.006)            | 2.93 **             |                             |
| Cu       | Intercept      | 0.468 (0.104)            | 4.50 **             | 0.42                        |
|          | Time           | −0.044 (0.008)           | −5.28 **            |                             |
|          | Species        | 0.185 (0.147)            | 1.26 <sup>ns</sup>  |                             |
|          | Species × Time | −0.022 (0.112)           | −1.91 <sup>ns</sup> |                             |

<sup>ns</sup>: no significant; \*\*:  $p < 0.05$ ; R<sub>p</sub><sup>2</sup>: conditional pseudo-R squared. <sup>1</sup> The values in parentheses indicate the standard error.

**Table S6.** Generalized linear mixed models adjusted for data of both forest species for the remaining nutrient content (C2 layer).

| Nutrient |                | Coefficient <sup>1</sup> | t-value              | R <sub>p</sub> <sup>2</sup> |
|----------|----------------|--------------------------|----------------------|-----------------------------|
| P        | Intercept      | 0.042 (0.050)            | 0.84 <sup>ns</sup>   | 0.64                        |
|          | Time           | −0.032 (0.004)           | −7.53 <sup>**</sup>  |                             |
|          | Species        | 0.071 (0.071)            | 1.01 <sup>ns</sup>   |                             |
|          | Species × Time | −0.017 (0.006)           | −2.80 <sup>**</sup>  |                             |
| K        | Intercept      | −0.268 (0.118)           | −2.27 <sup>**</sup>  | 0.74                        |
|          | Time           | −0.109 (0.011)           | −10.12 <sup>**</sup> |                             |
|          | Species        | 0.219 (0.167)            | 1.31 <sup>ns</sup>   |                             |
|          | Species × Time | −0.027 (0.015)           | −1.75 <sup>ns</sup>  |                             |
| Ca       | Intercept      | −0.003 (0.049)           | −0.06 <sup>ns</sup>  | 0.54                        |
|          | Time           | −0.023 (0.004)           | −5.95 <sup>**</sup>  |                             |
|          | Species        | 0.044 (0.070)            | 0.63 <sup>ns</sup>   |                             |
|          | Species × Time | −0.009 (0.005)           | −1.61 <sup>ns</sup>  |                             |
| Mg       | Intercept      | 0.021 (0.052)            | 0.41 <sup>ns</sup>   | 0.63                        |
|          | Time           | −0.035 (0.005)           | −7.87 <sup>**</sup>  |                             |
|          | Species        | 0.125 (0.074)            | 1.70 <sup>ns</sup>   |                             |
|          | Species × Time | −0.006 (0.006)           | −1.01 <sup>ns</sup>  |                             |
| Fe       | Intercept      | 0.094 (0.070)            | 1.34 <sup>ns</sup>   | 0.54                        |
|          | Time           | 0.037 (0.006)            | 6.13 <sup>**</sup>   |                             |
|          | Species        | 0.164 (0.098)            | 1.67 <sup>ns</sup>   |                             |
|          | Species × Time | −0.020 (0.008)           | −2.38 <sup>**</sup>  |                             |
| Mn       | Intercept      | −0.016 (0.062)           | −0.26 <sup>ns</sup>  | 0.73                        |
|          | Time           | −0.032 (0.005)           | −6.34 <sup>**</sup>  |                             |
|          | Species        | 0.194 (0.087)            | 2.23 <sup>**</sup>   |                             |
|          | Species × Time | 0.015 (0.007)            | 2.08 <sup>**</sup>   |                             |
| Cu       | Intercept      | −0.015 (0.065)           | −0.23 <sup>ns</sup>  | 0.59                        |
|          | Time           | −0.035 (0.005)           | −6.74 <sup>**</sup>  |                             |
|          | Species        | 0.206 (0.092)            | 2.25 <sup>**</sup>   |                             |
|          | Species × Time | −0.017 (0.007)           | −2.35 <sup>**</sup>  |                             |

<sup>ns</sup>: no significant; <sup>\*\*</sup>:  $p < 0.05$ ; R<sub>p</sub><sup>2</sup>: conditional pseudo-R squared. <sup>1</sup> The values in parentheses indicate the standard error.

**Table S7.** Generalized linear mixed models adjusted for data of both forest species for the remaining nutrient content (C3 layer).

| Nutrient |                | Coefficient <sup>1</sup> | t-value             | R <sub>p</sub> <sup>2</sup> |
|----------|----------------|--------------------------|---------------------|-----------------------------|
| K        | Intercept      | −0.343 (0.118)           | −2.91 **            | 0.71                        |
|          | Time           | −0.107 (0.013)           | −8.20 **            |                             |
|          | Species        | −0.006 (0.167)           | −0.04 <sup>ns</sup> |                             |
|          | Species × Time | −0.036 (0.018)           | −1.98 **            |                             |
| Mg       | Intercept      | 0.002 (0.068)            | 0.02 <sup>ns</sup>  | 0.55                        |
|          | Time           | −0.032 (0.006)           | −5.34 **            |                             |
|          | Species        | 0.046 (0.096)            | 0.48 <sup>ns</sup>  |                             |
|          | Species × Time | −0.013 (0.009)           | −1.47 <sup>ns</sup> |                             |
| Fe       | Intercept      | 0.158 (0.094)            | 1.69 <sup>ns</sup>  | 0.70                        |
|          | Time           | 0.052 (0.008)            | 6.38 **             |                             |
|          | Species        | −0.211 (0.132)           | −1.60 <sup>ns</sup> |                             |
|          | Species × Time | −0.012 (0.012)           | −1.00 <sup>ns</sup> |                             |

<sup>ns</sup>: no significant; \*\*:  $p < 0.05$ ; R<sub>p</sub><sup>2</sup>: conditional pseudo-R squared. <sup>1</sup> The values in parentheses indicate the standard error.
